# Supplementary material for: The interaction between vacancy defects in gallium sulfide monolayer and a new vacancy defect model
Source: Royal Society of Chemistry journal article supplement (doi:10.1039/d1cp01194d), 2021-01-01
Supplement: d1cp01194d1.pdf [file d1cp01194d1.pdf]

## Supplementary information for

### The interaction between vacancy defects in gallium sulfide monolayer and a new vacancy defect model

Tao Zhang<sup>1</sup>, Ying Liang<sup>1</sup>, Hao Guo<sup>1</sup>, Tian C. Zhan<sup>2</sup>, Haidong Fan<sup>1</sup>, Xiaobao Tian<sup>1\*</sup>

<sup>1</sup> College of Architecture & Environment, Sichuan University, Chengdu, Sichuan 610065, China

<sup>2</sup> Civil & Environmental Engineering Department, University of Nebraska-Lincoln, Omaha, NE 68182-0178, USA

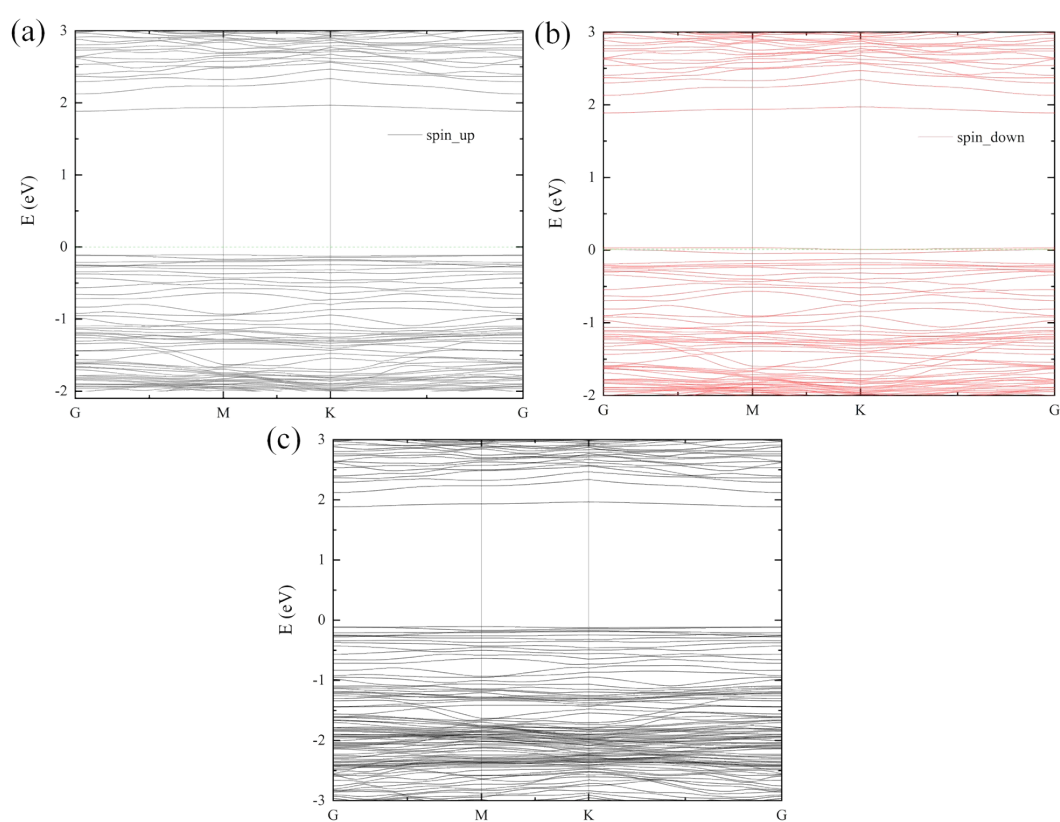

Fig. S1 Band structure of (a)-(b)  $4 \times 5 \times 1$  GaS monolayer with a Ga vacancy and (c)  $4 \times 5 \times 1$  pristine GaS monolayer. The Fermi level is set to zero.

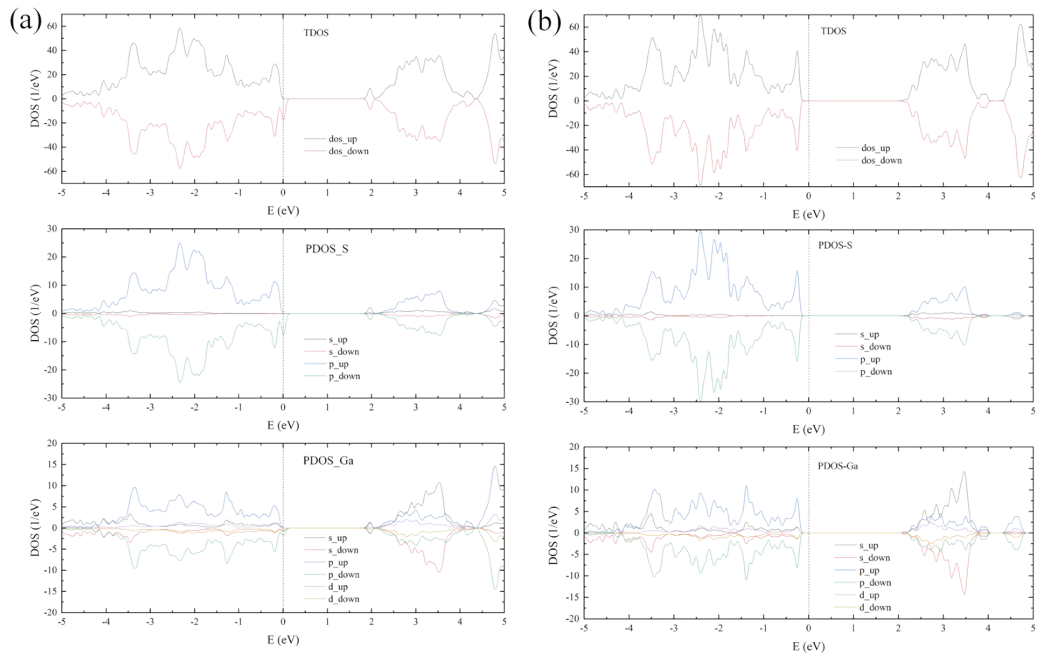

Fig. S2 Density of states of (a)  $4 \times 4 \times 1$  GaS monolayer and (b)  $4 \times 4 \times 1$  GaS monolayer with a Ga vacancy.

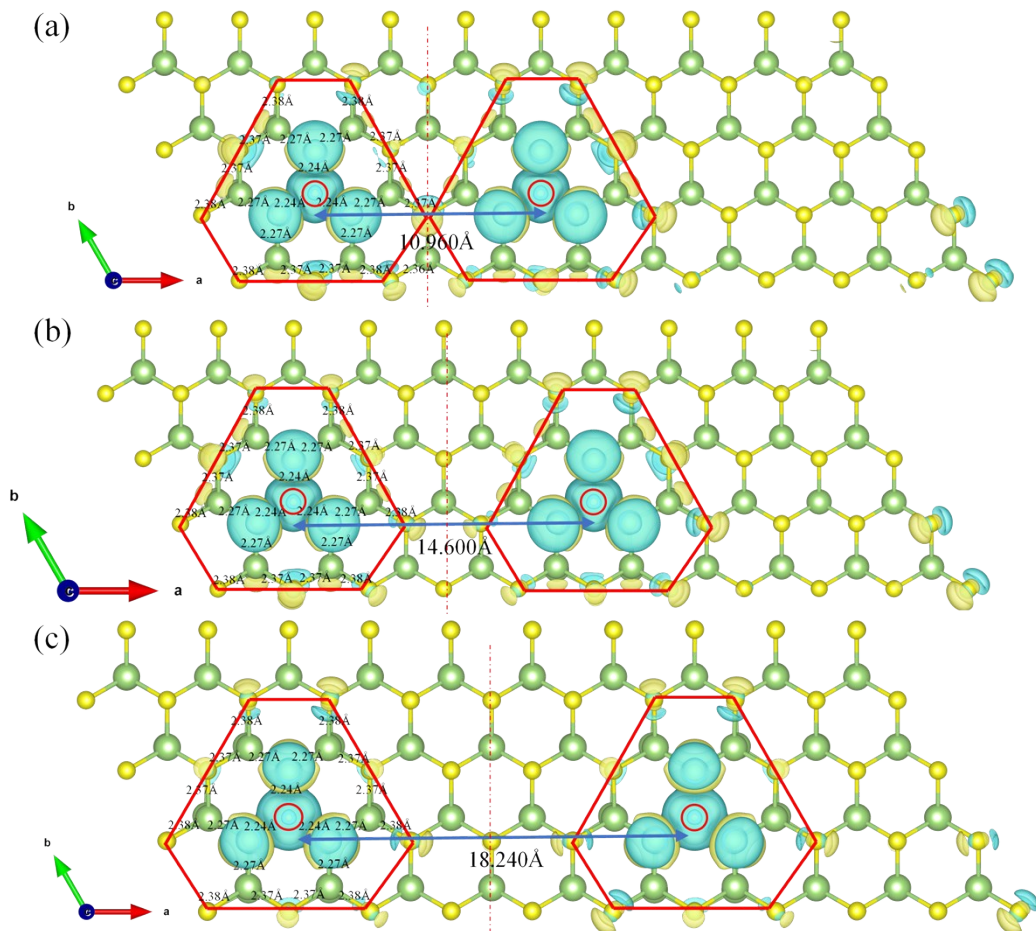

Fig. S3 Charge density difference of  $4 \times 10 \times 1$  defective GaS monolayer. The relative distance of vacancies is (a)  $10.960 \text{ \AA}$ , (b)  $14.600 \text{ \AA}$ , (c)  $18.240 \text{ \AA}$ . The isoface value is set to  $0.005 \text{ e/\AA}^3$ .

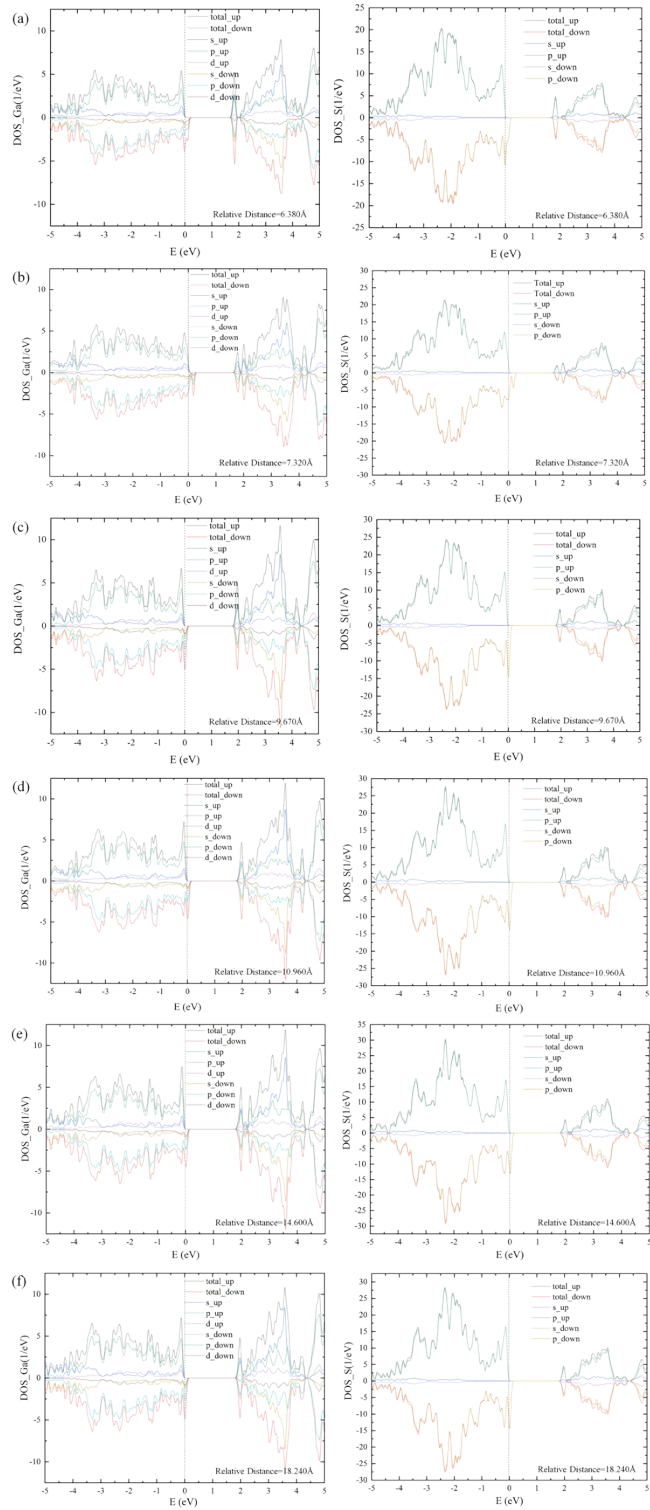

---

Fig. S4 Projected density of state (PDOS) of Ga atoms and S atoms in red box under different RDVs-Ga. The relative distance of Ga vacancies is (a) 6.380 Å, (b) 7.320 Å, (c) 9.670 Å, (d) 10.960 Å, (e) 14.600 Å and (f) 18.240 Å, respectively. The vertical dash line indicates the  $E_F$ .

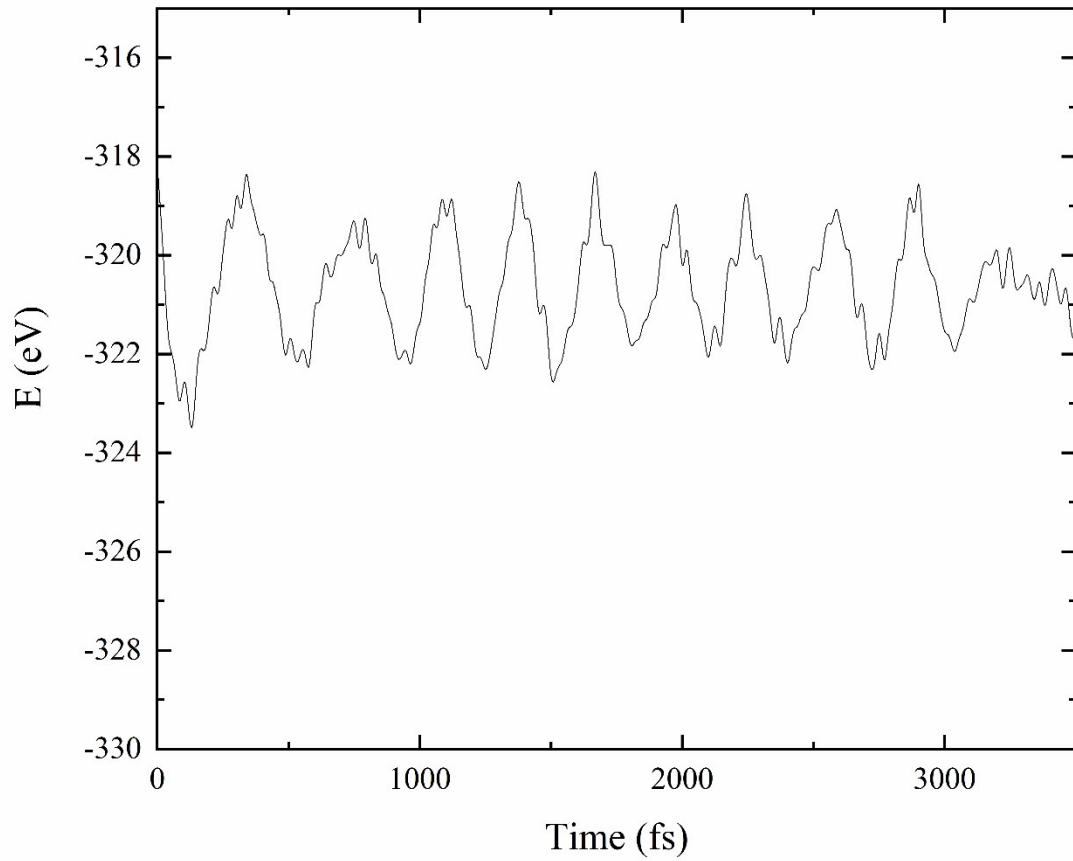

Fig. S5 Ab initio molecular dynamic simulation of  $4 \times 5 \times 1$   $V_{Ga}$  defected GaS monolayer under  $T=600K$ .

Table S1. The bandgap of different vacancy defect model.

| □       | traditional concentration model |                         | VDCM (4%)                                                                    |                                                                              |                                                                              |                                                                              | VDCM (3%) | TB model (3%) |
|---------|---------------------------------|-------------------------|------------------------------------------------------------------------------|------------------------------------------------------------------------------|------------------------------------------------------------------------------|------------------------------------------------------------------------------|-----------|---------------|
|         | 3×4-V <sub>1</sub> (4%)         | 4×4-V <sub>1</sub> (3%) | V <sub>1</sub> -V <sub>2</sub> <sup>1</sup> -<br>V <sub>3</sub> <sup>1</sup> | V <sub>1</sub> -V <sub>2</sub> <sup>1</sup> -<br>V <sub>3</sub> <sup>2</sup> | V <sub>1</sub> -V <sub>2</sub> <sup>2</sup> -<br>V <sub>3</sub> <sup>1</sup> | V <sub>1</sub> -V <sub>2</sub> <sup>3</sup> -<br>V <sub>3</sub> <sup>1</sup> | -         | -             |
| bandgap | 1.042                           | 1.116                   | 0.892                                                                        | 0.899                                                                        | 0.946                                                                        | 1.005                                                                        | 0.916     | 0.75          |
